# Supplementary material for: Correlational Study of Aminopeptidase Activities between Left or Right Frontal Cortex versus the Hypothalamus, Pituitary, Adrenal Axis of Spontaneously Hypertensive Rats Treated with Hypotensive or Hypertensive Agents
Source: MDPI journal article supplement (doi:10.3390/ijms242116007), 2023-11-06
Supplement: s1 [file s1]

SUPPLEMENTARY MATERIAL: Table S1A, Table S1B, Table S2A, Table S2B, Table S3A and Table S3B

Table S1A: Positive or negative correlations between the angiotensinase activities analyzed in the right or left frontal cortices versus angiotensinase activities analyzed in hypothalamus, pituitary or adrenal gland in control SHR.

| FRONTAL CORTEX |     | HYPOTHALAMUS                |       |       |                            |       |       | PITUITARY |       |                             |                             |       |       | ADRENAL                    |       |        |       |                             |       |
|----------------|-----|-----------------------------|-------|-------|----------------------------|-------|-------|-----------|-------|-----------------------------|-----------------------------|-------|-------|----------------------------|-------|--------|-------|-----------------------------|-------|
|                |     | HAS                         | HCS   | HGS   | HAM                        | HCM   | HGM   | PAS       | PCS   | PGS                         | PAM                         | PCM   | PGM   | AAS                        | ACS   | AGS    | AAM   | ACM                         | AGM   |
| RIGHT          | RAS | <b>-0.74</b><br><i>0.03</i> | -0.35 | -0.49 | -0.11                      | 0.06  | 0.04  | -0.13     | -0.45 | 0.03                        | <b>-0.74</b><br><i>0.03</i> | -0.64 | -0.03 | -0.29                      | -0.43 | -0.09  | -0.14 | -0.5                        | 0.31  |
|                | RCS | -0.51                       | -0.23 | -0.29 | -0.34                      | -0.1  | -0.26 | -0.01     | -0.25 | 0.24                        | -0.49                       | -0.56 | 0.23  | -0.36                      | -0.49 | -0.003 | -0.58 | <b>-0.80</b><br><i>0.01</i> | 0.05  |
|                | RGS | -0.51                       | -0.15 | -0.21 | -0.21                      | 0.03  | -0.19 | 0.08      | -0.20 | 0.38                        | -0.46                       | -0.40 | 0.33  | -0.19                      | -0.32 | -0.16  | -0.5  | -0.68                       | 0.05  |
|                | RAM | -0.19                       | -0.42 | -0.44 | -0.15                      | -0.06 | 0.07  | -0.61     | -0.13 | -0.08                       | -0.004                      | -0.12 | 0.004 | -0.28                      | 0.26  | 0.33   | 0.56  | 0.44                        | 0.07  |
|                | RCM | 0.27                        | -0.18 | -0.13 | -0.49                      | 0.005 | -0.21 | -0.55     | -0.08 | 0.1                         | 0.17                        | -0.04 | 0.07  | -0.42                      | -0.04 | 0.41   | 0.06  | 0.06                        | 0.1   |
|                | RGM | 0.34                        | -0.31 | 0.06  | -0.1                       | -0.31 | -0.31 | -0.42     | -0.06 | 0.11                        | 0.26                        | 0.25  | 0.51  | -0.3                       | 0.38  | 0.63   | -0.22 | 0.04                        | -0.12 |
| LEFT           | LAS | -0.28                       | 0.32  | 0.24  | 0.18                       | 0.27  | -0.28 | 0.34      | 0.03  | 0.07                        | -0.24                       | 0.006 | -0.03 | 0.43                       | -0.06 | -0.29  | 0.02  | 0.02                        | -0.33 |
|                | LCS | -0.16                       | 0.58  | 0.39  | 0.32                       | 0.25  | -0.12 | 0.65      | 0.44  | 0.11                        | 0.13                        | 0.26  | -0.06 | <b>0.75</b><br><i>0.03</i> | 0.16  | -0.58  | 0.22  | 0.27                        | -0.56 |
|                | LGS | 0.42                        | 0.07  | 0.24  | <b>0.77</b><br><i>0.02</i> | 0.03  | 0.67  | 0.18      | -0.14 | -0.64                       | 0.03                        | 0.41  | -0.53 | 0.32                       | 0.26  | -0.04  | 0.34  | 0.52                        | 0.17  |
|                | LAM | 0.34                        | 0.45  | 0.33  | -0.28                      | -0.14 | -0.4  | 0.22      | 0.32  | -0.25                       | 0.3                         | -0.04 | -0.36 | 0.06                       | -0.42 | 0.1    | -0.19 | -0.12                       | 0.18  |
|                | LCM | 0.14                        | -0.36 | -0.09 | 0.38                       | -0.05 | 0.57  | -0.04     | -0.38 | -0.05                       | -0.19                       | 0.13  | 0.12  | -0.18                      | 0.15  | 0.01   | -0.25 | -0.17                       | 0.26  |
|                | LGM | 0.55                        | 0.58  | 0.63  | -0.43                      | 0.34  | -0.53 | 0.36      | 0.47  | <b>0.89</b><br><i>0.003</i> | 0.56                        | 0.50  | 0.62  | 0.24                       | 0.06  | -0.31  | -0.55 | -0.29                       | -0.61 |

Positive (black) or negative (red) correlations of soluble (S) or membrane-bound (M) angiotensinase activities between right (R) or left (L) frontal cortices versus angiotensinase activities of hypothalamus (H), pituitary (P) and adrenal (A) in CONTROL SHR. When significant, Pearson's correlation coefficients (r) and p values (italics) are indicated in bold. Soluble Alanyl-aminopeptidase (AS); membrane-bound Alanyl-aminopeptidase (AM); Soluble cystinyl-aminopeptidase (CS); membrane-bound cystinyl-aminopeptidase (CM); soluble glutamyl-aminopeptidase (GS); membrane-bound glutamyl-aminopeptidase (GM).

Table S1B: Positive or negative correlations between the angiotensinase activities analyzed in hypothalamus, pituitary or adrenal gland versus angiotensinase activities analyzed in hypothalamus, pituitary or adrenal gland in control SHR.

|              |     | HYPOTHALAMUS |      |                             |      |      |                            | PITUITARY                   |       |       |                             |                            |                            | ADRENAL                     |       |                              |       |                             |                             |
|--------------|-----|--------------|------|-----------------------------|------|------|----------------------------|-----------------------------|-------|-------|-----------------------------|----------------------------|----------------------------|-----------------------------|-------|------------------------------|-------|-----------------------------|-----------------------------|
|              |     | HAS          | HCS  | HGS                         | HAM  | HCM  | HGM                        | PAS                         | PCS   | PGS   | PAM                         | PCM                        | PGM                        | AAS                         | ACS   | AGS                          | AAM   | ACM                         | AGM                         |
| HYPOTHALAMUS | HAS | 1            | 0.58 | <b>0.81</b><br><i>0.01</i>  | 0.1  | 0.39 | -0.02                      | 0.34                        | 0.17  | 0.19  | 0.48                        | <b>0.72</b><br><i>0.04</i> | 0.01                       | 0.34                        | 0.08  | -0.17                        | -0.3  | 0.07                        | -0.25                       |
|              | HCS |              | 1    | <b>0.89</b><br><i>0.003</i> | 0.08 | 0.57 | -0.18                      | <b>0.84</b><br><i>0.009</i> | 0.54  | 0.42  | 0.46                        | 0.62                       | -0.02                      | <b>0.78</b><br><i>0.02</i>  | -0.03 | <b>-0.73</b><br><i>0.03</i>  | -0.19 | 0.03                        | -0.58                       |
|              | HGS |              |      | 1                           | 0.19 | 0.59 | -0.14                      | <b>0.72</b><br><i>0.04</i>  | 0.38  | 0.42  | 0.46                        | <b>0.80</b><br><i>0.01</i> | 0.09                       | <b>0.72</b><br><i>0.04</i>  | 0.1   | -0.56                        | -0.29 | 0.05                        | -0.59                       |
|              | HAM |              |      |                             | 1    | 0.25 | <b>0.80</b><br><i>0.01</i> | 0.33                        | -0.1  | -0.38 | -0.06                       | 0.52                       | -0.32                      | 0.61                        | 0.55  | -0.39                        | 0.56  | 0.69                        | -0.21                       |
|              | HCM |              |      |                             |      | 1    | 0.16                       | 0.35                        | -0.26 | 0.24  | -0.26                       | 0.40                       | -0.27                      | 0.51                        | -0.18 | -0.63                        | 0.03  | 0.07                        | -0.28                       |
|              | HGM |              |      |                             |      |      | 1                          | 0.08                        | -0.3  | -0.48 | -0.24                       | 0.19                       | -0.46                      | 0.24                        | 0.31  | -0.29                        | 0.54  | 0.5                         | 0.18                        |
| PITUITARY    | PAS |              |      |                             |      |      |                            | 1                           | 0.62  | 0.40  | 0.46                        | 0.61                       | 0.09                       | <b>0.84</b><br><i>0.009</i> | 0.17  | <b>-0.86</b><br><i>0.006</i> | -0.17 | 0.04                        | -0.6                        |
|              | PCS |              |      |                             |      |      |                            |                             | 1     | 0.48  | <b>0.89</b><br><i>0.003</i> | 0.44                       | 0.47                       | 0.49                        | 0.42  | -0.36                        | -0.09 | 0.14                        | -0.66                       |
|              | PGS |              |      |                             |      |      |                            |                             |       | 1     | 0.43                        | 0.36                       | <b>0.80</b><br><i>0.01</i> | 0.22                        | 0.14  | -0.4                         | -0.55 | -0.38                       | -0.68                       |
|              | PAM |              |      |                             |      |      |                            |                             |       |       | 1                           | 0.62                       | 0.51                       | 0.39                        | 0.54  | -0.16                        | -0.12 | 0.23                        | -0.62                       |
|              | PCM |              |      |                             |      |      |                            |                             |       |       |                             | 1                          | 0.25                       | <b>0.77</b><br><i>0.02</i>  | 0.64  | -0.51                        | 0.05  | 0.47                        | <b>-0.75</b><br><i>0.03</i> |
|              | PGM |              |      |                             |      |      |                            |                             |       |       |                             |                            | 1                          | -0.04                       | 0.44  | 0.03                         | -0.47 | -0.26                       | -0.57                       |
| ADRENAL      | AAS |              |      |                             |      |      |                            |                             |       |       |                             |                            |                            | 1                           | 0.44  | <b>-0.82</b><br><i>0.01</i>  | 0.2   | 0.5                         | <b>-0.74</b><br><i>0.03</i> |
|              | ACS |              |      |                             |      |      |                            |                             |       |       |                             |                            |                            |                             | 1     | -0.11                        | 0.43  | <b>0.70</b><br><i>0.05</i>  | -0.64                       |
|              | AGS |              |      |                             |      |      |                            |                             |       |       |                             |                            |                            |                             |       | 1                            | -0.03 | -0.11                       | 0.55                        |
|              | AAM |              |      |                             |      |      |                            |                             |       |       |                             |                            |                            |                             |       |                              | 1     | <b>0.88</b><br><i>0.003</i> | -0.04                       |
|              | ACM |              |      |                             |      |      |                            |                             |       |       |                             |                            |                            |                             |       |                              |       | 1                           | -0.34                       |
|              | AGM |              |      |                             |      |      |                            |                             |       |       |                             |                            |                            |                             |       |                              |       |                             | 1                           |

Positive (black) or negative (red) correlations of soluble (S) or membrane-bound (M) angiotensinase activities between hypothalamus (H), pituitary (P) and adrenal (A) versus angiotensinase activities of hypothalamus, pituitary and adrenal in CONTROL SHR. When significant, Pearson's correlation coefficients (r) and p values (italics) are indicated

in bold. Soluble Alanyl-aminopeptidase (AS); membrane-bound Alanyl-aminopeptidase (AM); Soluble cystinyl-aminopeptidase (CS); membrane-bound cystinyl-aminopeptidase (CM); soluble glutamyl-aminopeptidase (GS); membrane-bound glutamyl-aminopeptidase (GM).

Table S2A: Positive or negative correlations between the angiotensinase activities analyzed in the right or left frontal cortices versus angiotensinase activities analyzed in hypothalamus, pituitary or adrenal gland in captopril treated SHR.

| FRONTAL CORTEX |     | HYPOTHALAMUS |       |               |       |       |       | PITUITARY    |       |       |       |       |               | ADRENAL |       |              |       |       |               |
|----------------|-----|--------------|-------|---------------|-------|-------|-------|--------------|-------|-------|-------|-------|---------------|---------|-------|--------------|-------|-------|---------------|
|                |     | HAS          | HCS   | HGS           | HAM   | HCM   | HGM   | PAS          | PCS   | PGS   | PAM   | PCM   | PGM           | AAS     | ACS   | AGS          | AAM   | ACM   | AGM           |
| RIGHT          | RAS | 0.13         | 0.08  | -0.08         | -0.47 | -0.48 | -0.57 | 0.21         | -0.46 | 0.11  | 0.04  | 0.19  | 0.48          | -0.1    | -0.13 | 0.36         | 0.19  | 0.06  | 0.5           |
|                | RCS | -0.42        | 0.68  | 0.27          | -0.12 | 0.15  | 0.002 | 0.27         | -0.01 | -0.15 | -0.37 | 0.16  | 0.02          | -0.18   | -0.32 | 0.28         | -0.02 | -0.03 | 0.02          |
|                | RGS | -0.19        | 0.49  | 0.04          | -0.42 | -0.34 | -0.41 | 0.33         | -0.57 | -0.16 | -0.11 | 0.43  | 0.30          | -0.4    | -0.4  | 0.15         | 0.43  | 0.36  | 0.52          |
|                | RAM | -0.04        | 0.05  | -0.56         | 0.26  | 0.18  | 0.44  | 0.08         | 0.04  | -0.16 | 0.31  | 0.12  | -0.27         | 0.54    | 0.34  | 0.12         | 0.34  | 0.38  | 0.26          |
|                | RCM | -0.1         | -0.11 | -0.06         | -0.14 | 0.29  | 0.26  | -0.21        | 0.23  | -0.13 | -0.34 | -0.54 | -0.72<br>0.02 | 0.43    | 0.19  | -0.09        | -0.15 | -0.16 | -0.36         |
|                | RGM | -0.07        | 0.13  | 0.70<br>0.05  | 0.37  | 0.55  | 0.39  | -0.1         | 0.69  | -0.04 | -0.43 | -0.33 | -0.26         | -0.13   | -0.02 | -0.1         | -0.68 | -0.6  | -0.82<br>0.01 |
| LEFT           | LAS | -0.21        | 0.09  | -0.56         | 0.67  | 0.38  | 0.58  | -0.1         | 0.57  | -0.23 | 0.42  | -0.09 | -0.15         | 0.58    | 0.56  | 0.38         | -0.47 | -0.32 | -0.31         |
|                | LCS | -0.37        | 0.18  | -0.37         | -0.07 | -0.34 | -0.29 | -0.5         | -0.39 | -0.27 | 0.54  | 0.08  | -0.02         | -0.11   | -0.13 | -0.08        | -0.08 | 0.12  | 0.14          |
|                | LGS | -0.66        | 0.34  | -0.41         | 0.22  | 0.06  | 0.14  | -0.56        | -0.09 | -0.34 | 0.43  | 0.02  | -0.38         | -0.001  | -0.13 | -0.23        | -0.11 | 0.17  | -0.19         |
|                | LAM | 0.1          | 0.24  | -0.02         | -0.08 | -0.2  | 0.07  | 0.70<br>0.05 | -0.23 | -0.55 | 0.19  | 0.31  | 0.12          | 0.5     | 0.59  | 0.72<br>0.02 | 0.42  | 0.25  | 0.57          |
|                | LCM | 0.48         | -0.09 | 0.89<br>0.003 | -0.19 | -0.02 | -0.06 | 0.4          | 0.11  | -0.37 | -0.5  | -0.19 | -0.07         | -0.16   | 0.23  | 0.07         | -0.16 | -0.33 | -0.3          |
|                | LGM | 0.14         | -0.17 | 0.12          | 0.11  | 0.22  | 0.37  | 0.09         | 0.35  | -0.36 | -0.06 | -0.38 | -0.48         | 0.64    | 0.65  | 0.26         | -0.2  | 0.26- | 0.27-         |

Positive (black) or negative (red) correlations of soluble (S) or membrane-bound (M) angiotensinase activities between right (R) or left (L) frontal cortices versus angiotensinase activities of hypothalamus (H), pituitary (P) and adrenal (A) in CAPTOPRIL SHR. When significant, Pearson's correlation coefficients (r) and p values (italics) are indicated in bold. Soluble Alanyl-aminopeptidase (AS); membrane-bound Alanyl-aminopeptidase (AM); Soluble cystinyl-aminopeptidase (CS); membrane-bound cystinyl-aminopeptidase (CM); soluble glutamyl-aminopeptidase (GS); membrane-bound glutamyl-aminopeptidase (GM).

Table S2B: Positive or negative correlations between the angiotensinase activities analyzed in hypothalamus, pituitary or adrenal gland versus angiotensinase activities analyzed in hypothalamus, pituitary or adrenal gland in captopril treated SHR.

|              |     | HYPOTHALAMUS |                             |      |       |                            |                             | PITUITARY |                            |       |       |       |       | ADRENAL |                             |                            |                            |                              |                            |
|--------------|-----|--------------|-----------------------------|------|-------|----------------------------|-----------------------------|-----------|----------------------------|-------|-------|-------|-------|---------|-----------------------------|----------------------------|----------------------------|------------------------------|----------------------------|
|              |     | HAS          | HCS                         | HGS  | HAM   | HCM                        | HGM                         | PAS       | PCS                        | PGS   | PAM   | PCM   | PGM   | AAS     | ACS                         | AGS                        | AAM                        | ACM                          | AGM                        |
| HYPOTHALAMUS | HAS | 1            | <b>-0.82</b><br><i>0.01</i> | 0.34 | -0.30 | -0.52                      | -0.52                       | 0.13      | -0.08                      | 0.2   | 0.07  | -0.24 | 0.48  | 0.06    | 0.44                        | 0.18                       | -0.18                      | -0.41                        | 0.03                       |
|              | HCS |              | 1                           | 0.02 | 0.24  | 0.45                       | 0.48                        | 0.37      | 0.02                       | -0.38 | -0.23 | 0.47  | -0.23 | -0.15   | -0.34                       | 0.1                        | 0.34                       | 0.43                         | 0.13                       |
|              | HGS |              |                             | 1    | -0.12 | 0.16                       | -0.004                      | 0.3       | 0.31                       | -0.2  | -0.68 | -0.28 | -0.08 | -0.05   | 0.04                        | 0.05                       | -0.38                      | -0.52                        | -0.52                      |
|              | HAM |              |                             |      | 1     | <b>0.71</b><br><i>0.04</i> | <b>0.85</b><br><i>0.007</i> | 0.22      | 0.69                       | 0.30  | 0.22  | 0.40  | 0.20  | 0.14    | 0.06                        | 0.07                       | -0.03                      | 0.08                         | -0.13                      |
|              | HCM |              |                             |      |       | 1                          | <b>0.91</b><br><i>0.001</i> | 0.13      | <b>0.83</b><br><i>0.01</i> | 0.25  | -0.44 | 0.03  | -0.3  | 0.05    | -0.2                        | -0.09                      | -0.2                       | -0.1                         | -0.52                      |
|              | HGM |              |                             |      |       |                            | 1                           | 0.27      | <b>0.75</b><br><i>0.03</i> | 0.08  | -0.14 | 0.25  | -0.20 | 0.24    | 0.03                        | 0.08                       | -0.03                      | 0.06                         | -0.28                      |
| PITUITARY    | PAS |              |                             |      |       |                            |                             | 1         | 0.04                       | -0.09 | -0.14 | 0.62  | 0.48  | 0.05    | 0.16                        | 0.51                       | 0.50                       | 0.29                         | 0.46                       |
|              | PCS |              |                             |      |       |                            |                             |           | 1                          | 0.33  | -0.31 | -0.26 | -0.15 | 0.31    | 0.18                        | 0.13                       | -0.58                      | -0.54                        | -0.69                      |
|              | PGS |              |                             |      |       |                            |                             |           |                            | 1     | -0.06 | 0.09  | 0.46  | -0.23   | -0.37                       | -0.3                       | -0.02                      | -0.03                        | -0.07                      |
|              | PAM |              |                             |      |       |                            |                             |           |                            |       | 1     | 0.31  | 0.39  | 0.34    | 0.41                        | 0.25                       | 0.18                       | 0.26                         | 0.54                       |
|              | PCM |              |                             |      |       |                            |                             |           |                            |       |       | 1     | 0.61  | -0.34   | -0.27                       | 0.05                       | <b>0.81</b><br><i>0.01</i> | <b>0.81</b><br><i>0.01</i>   | <b>0.73</b><br><i>0.03</i> |
|              | PGM |              |                             |      |       |                            |                             |           |                            |       |       |       | 1     | -0.19   | 0.03                        | 0.25                       | 0.35                       | 0.21                         | 0.57                       |
| ADRENAL      | AAS |              |                             |      |       |                            |                             |           |                            |       |       |       |       | 1       | <b>0.84</b><br><i>0.009</i> | <b>0.73</b><br><i>0.03</i> | -0.36                      | -0.39                        | -0.03                      |
|              | ACS |              |                             |      |       |                            |                             |           |                            |       |       |       |       |         | 1                           | <b>0.76</b><br><i>0.02</i> | -0.34                      | -0.44                        | 0.02                       |
|              | AGS |              |                             |      |       |                            |                             |           |                            |       |       |       |       |         |                             | 1                          | -0.13                      | -0.27                        | 0.27                       |
|              | AAM |              |                             |      |       |                            |                             |           |                            |       |       |       |       |         |                             |                            | 1                          | <b>0.94</b><br><i>0.0005</i> | <b>0.83</b><br><i>0.01</i> |
|              | ACM |              |                             |      |       |                            |                             |           |                            |       |       |       |       |         |                             |                            |                            | 1                            | <b>0.74</b><br><i>0.03</i> |
|              | AGM |              |                             |      |       |                            |                             |           |                            |       |       |       |       |         |                             |                            |                            |                              | 1                          |

Positive (black) or negative (red) correlations of soluble (S) or membrane-bound (M) angiotensinase activities between hypothalamus (H), pituitary (P) and adrenal (A) versus angiotensinase activities of hypothalamus, pituitary and adrenal in CAPTOPRIL SHR. When significant, Pearson's correlation coefficients (r) and p values (italics) are indicated in bold. Soluble Alanyl-aminopeptidase (AS); membrane-bound Alanyl-aminopeptidase (AM); Soluble cystinyl-aminopeptidase (CS); membrane-bound cystinyl-aminopeptidase (CM); soluble glutamyl-aminopeptidase (GS); membrane-bound glutamyl-aminopeptidase (GM).

Table S3A: Positive or negative correlations between the angiotensinase activities analyzed in the right or left frontal cortices versus angiotensinase activities analyzed in hypothalamus, pituitary or adrenal gland in L-NAME treated SHR.

| FRONTAL CORTEX |     | HYPOTHALAMUS |              |              |       |       |       | PITUITARY     |               |       |               |       |               | ADRENAL      |              |       |               |       |       |
|----------------|-----|--------------|--------------|--------------|-------|-------|-------|---------------|---------------|-------|---------------|-------|---------------|--------------|--------------|-------|---------------|-------|-------|
|                |     | HAS          | HCS          | HGS          | HAM   | HCM   | HGM   | PAS           | PCS           | PGS   | PAM           | PCM   | PGM           | AAS          | ACS          | AGS   | AAM           | ACM   | AGM   |
| RIGHT          | RAS | 0.67         | -0.07        | 0.21         | -0.16 | -0.29 | -0.20 | -0.20         | 0.42          | -0.14 | -0.29         | -0.60 | -0.26         | 0.34         | 0.18         | -0.06 | -0.07         | -0.25 | -0.57 |
|                | RCS | 0.28         | -0.02        | 0.16         | 0.08  | -0.15 | 0.12  | -0.27         | 0.04          | -0.57 | -0.56         | -0.60 | -0.58         | -0.11        | -0.26        | -0.11 | -0.22         | -0.39 | -0.05 |
|                | RGS | 0.4          | -0.05        | 0.15         | -0.06 | -0.31 | -0.02 | -0.27         | 0.17          | -0.52 | -0.42         | -0.64 | -0.46         | -0.09        | -0.27        | -0.16 | -0.25         | -0.46 | -0.01 |
|                | RAM | -0.46        | -0.07        | -0.15        | 0.27  | 0.21  | 0.30  | 0.16          | -0.06         | -0.24 | -0.83<br>0.01 | -0.13 | -0.69         | 0.23         | 0.13         | -0.26 | -0.38         | -0.3  | -0.18 |
|                | RCM | 0.02         | -0.59        | -0.49        | -0.52 | -0.52 | -0.49 | 0.54          | 0.73<br>0.03  | 0.26  | -0.2          | -0.24 | -0.43         | 0.70<br>0.05 | 0.65         | -0.3  | -0.63         | -0.67 | -0.41 |
|                | RGM | 0.36         | 0.02         | 0.25         | 0.11  | -0.07 | 0.11  | -0.16         | 0.2           | -0.35 | -0.60         | -0.42 | -0.44         | 0.16         | -0.18        | -0.3  | -0.09         | -0.24 | -0.22 |
| LEFT           | LAS | 0.22         | 0.74<br>0.03 | 0.78<br>0.02 | 0.47  | 0.43  | 0.55  | -0.78<br>0.02 | -0.44         | -0.51 | -0.68         | -0.68 | -0.05         | -0.37        | -0.34        | 0.19  | 0.32          | 0.14  | -0.19 |
|                | LCS | -0.59        | -0.26        | -0.41        | -0.25 | -0.2  | -0.14 | 0.2           | 0.05          | -0.15 | -0.24         | -0.11 | -0.1          | 0.05         | 0.09         | -0.41 | -0.71<br>0.04 | -0.65 | 0.25  |
|                | LGS | -0.35        | -0.32        | -0.40        | -0.28 | -0.33 | -0.25 | -0.09         | -0.08         | -0.45 | -0.004        | -0.25 | -0.03         | -0.17        | -0.05        | -0.29 | -0.74<br>0.03 | -0.65 | 0.23  |
|                | LAM | -0.23        | 0.56         | 0.42         | 0.53  | 0.57  | 0.49  | -0.66         | -0.77<br>0.02 | -0.43 | -0.21         | -0.09 | 0.25          | -0.47        | -0.31        | 0.2   | 0.25          | 0.38  | -0.02 |
|                | LCM | 0.12         | -0.23        | -0.28        | -0.43 | -0.24 | -0.42 | 0.26          | 0.33          | 0.56  | 0.43          | -0.1  | 0.1           | 0.35         | 0.83<br>0.01 | 0.51  | -0.05         | -0.02 | -0.51 |
|                | LGM | 0.01         | -0.04        | -0.06        | 0.29  | 0.1   | 0.31  | -0.1          | -0.33         | -0.36 | -0.16         | -0.23 | -0.80<br>0.01 | -0.42        | -0.06        | 0.68  | 0.09          | 0.09  | 0.01  |

Positive (black) or negative (red) correlations of soluble (S) or membrane-bound (M) angiotensinase activities between right (R) or left (L) frontal cortices versus angiotensinase activities of hypothalamus (H), pituitary (P) and adrenal (A) in L-NAME SHR. When significant, Pearson's correlation coefficients (r) and p values (italics) are indicated in bold. Soluble Alanyl-aminopeptidase (AS); membrane-bound Alanyl-aminopeptidase (AM); Soluble cystinyl-aminopeptidase (CS); membrane-bound cystinyl-aminopeptidase (CM); soluble glutamyl-aminopeptidase (GS); membrane-bound glutamyl-aminopeptidase (GM).

Table S3B: Positive or negative correlations between the angiotensinase activities analyzed in hypothalamus, pituitary or adrenal gland versus angiotensinase activities analyzed in hypothalamus, pituitary or adrenal gland in L-NAME treated SHR.

|              |     | HYPOTHALAMUS |      |                             |       |                             |                              | PITUITARY            |                      |                            |       |       |       | ADRENAL                    |                            |       |                            |                             |       |
|--------------|-----|--------------|------|-----------------------------|-------|-----------------------------|------------------------------|----------------------|----------------------|----------------------------|-------|-------|-------|----------------------------|----------------------------|-------|----------------------------|-----------------------------|-------|
|              |     | HAS          | HCS  | HGS                         | HAM   | HCM                         | HGM                          | PAS                  | PCS                  | PGS                        | PAM   | PCM   | PGM   | AAS                        | ACS                        | AGS   | AAM                        | ACM                         | AGM   |
| HYPOTHALAMUS | HAS | 1            | 0.05 | 0.4                         | -0.28 | -0.39                       | -0.38                        | -0.45                | 0.36                 | -0.09                      | 0.29  | -0.46 | 0.37  | 0.11                       | -0.07                      | -0.02 | 0.19                       | -0.01                       | -0.39 |
|              | HCS |              | 1    | <b>0.91</b><br><b>0.001</b> | 0.66  | <b>0.76</b><br><b>0.02</b>  | <b>0.76</b><br><b>0.02</b>   | -0.58                | -0.56                | -0.09                      | -0.47 | -0.15 | 0.27  | -0.42                      | -0.45                      | 0.26  | <b>0.79</b><br><b>0.01</b> | 0.63                        | 0.06  |
|              | HGS |              |      | 1                           | 0.54  | 0.56                        | 0.57                         | -0.70<br><b>0.05</b> | -0.37                | -0.18                      | -0.4  | -0.28 | 0.37  | -0.3                       | -0.49                      | 0.11  | <b>0.77</b><br><b>0.02</b> | 0.56                        | -0.09 |
|              | HAM |              |      |                             | 1     | <b>0.92</b><br><b>0.001</b> | <b>0.94</b><br><b>0.0005</b> | -0.41                | -0.83<br><b>0.01</b> | -0.37                      | -0.58 | 0.24  | -0.24 | -0.43                      | -0.55                      | 0.21  | 0.63                       | <b>0.75</b><br><b>0.03</b>  | 0.07  |
|              | HCM |              |      |                             |       | 1                           | <b>0.92</b><br><b>0.001</b>  | -0.27                | -0.74<br><b>0.03</b> | -0.07                      | -0.56 | 0.31  | -0.06 | -0.29                      | -0.33                      | 0.24  | <b>0.70</b><br><b>0.05</b> | <b>0.80</b><br><b>0.01</b>  | 0.02  |
|              | HGM |              |      |                             |       |                             | 1                            | -0.34                | -0.81<br><b>0.01</b> | -0.28                      | -0.65 | 0.14  | -0.27 | -0.52                      | -0.52                      | 0.31  | 0.64                       | 0.66                        | 0.23  |
| PITUITARY    | PAS |              |      |                             |       |                             |                              | 1                    | 0.55                 | <b>0.71</b><br><b>0.04</b> | 0.20  | 0.56  | -0.19 | 0.53                       | 0.52                       | -0.21 | -0.33                      | -0.25                       | 0.16  |
|              | PCS |              |      |                             |       |                             |                              |                      | 1                    | 0.57                       | 0.31  | -0.07 | 0.2   | <b>0.77</b><br><b>0.02</b> | 0.55                       | -0.45 | -0.43                      | -0.57                       | -0.27 |
|              | PGS |              |      |                             |       |                             |                              |                      |                      | 1                          | 0.29  | 0.43  | 0.34  | 0.59                       | 0.6                        | -0.04 | 0.16                       | 0.11                        | -0.1  |
|              | PAM |              |      |                             |       |                             |                              |                      |                      |                            | 1     | 0.24  | 0.44  | -0.001                     | 0.15                       | 0.13  | -0.1                       | -0.06                       | 0.15  |
|              | PCM |              |      |                             |       |                             |                              |                      |                      |                            |       | 1     | 0.11  | 0.17                       | -0.06                      | -0.22 | 0.23                       | 0.48                        | 0.29  |
|              | PGM |              |      |                             |       |                             |                              |                      |                      |                            |       |       | 1     | 0.15                       | -0.06                      | -0.28 | 0.3                        | 0.21                        | -0.04 |
| ADRENAL      | AAS |              |      |                             |       |                             |                              |                      |                      |                            |       |       |       | 1                          | <b>0.71</b><br><b>0.04</b> | -0.54 | -0.3                       | -0.24                       | -0.62 |
|              | ACS |              |      |                             |       |                             |                              |                      |                      |                            |       |       |       |                            | 1                          | 0.09  | -0.39                      | -0.33                       | -0.61 |
|              | AGS |              |      |                             |       |                             |                              |                      |                      |                            |       |       |       |                            |                            | 1     | 0.35                       | 0.33                        | 0.01  |
|              | AAM |              |      |                             |       |                             |                              |                      |                      |                            |       |       |       |                            |                            |       | 1                          | <b>0.90</b><br><b>0.002</b> | 0.06  |
|              | ACM |              |      |                             |       |                             |                              |                      |                      |                            |       |       |       |                            |                            |       |                            | 1                           | -0.01 |
|              | AGM |              |      |                             |       |                             |                              |                      |                      |                            |       |       |       |                            |                            |       |                            |                             | 1     |

Positive (black) or negative (red) correlations of soluble (S) or membrane-bound (M) angiotensinase activities between hypothalamus (H), pituitary (P) and adrenal (A) versus angiotensinase activities of hypothalamus, pituitary and adrenal in L-NAME SHR. When significant, Pearson's correlation coefficients (r) and p values (italics) are indicated in bold. Soluble Alanyl-aminopeptidase (AS); membrane-bound Alanyl-aminopeptidase (AM); Soluble cystinyl-aminopeptidase (CS); membrane-bound cystinyl-aminopeptidase (CM); soluble glutamyl-aminopeptidase (GS); membrane-bound glutamyl-aminopeptidase (GM).
